# Supplementary material for: Basic polymerized imidazolide-based ionic liquid: an efficient catalyst for aqueous Knoevenagel condensation
Source: Royal Society of Chemistry journal article supplement (doi:10.1039/c5ra01700a), 2015-01-01
Supplement: c5ra01700a1.pdf [file c5ra01700a1.pdf]

# Basic polymerized imidazolid-based ionic liquid: An efficient catalyst for aqueous Knoevenagel condensation

Libing Ding,<sup>a</sup> Hansheng Li,<sup>a</sup> Yaping Zhang,<sup>a</sup> Kun Zhang,<sup>a</sup> Hong Yuan, Qin Wu, \*<sup>a</sup> Yun Zhao,<sup>a</sup> Qingze Jiao<sup>a,b</sup> and Daxin Shi<sup>\*a</sup>

<sup>a</sup> School of Chemical Engineering and the Environment, Beijing Institute of Technology, Beijing 100081, China.. Fax: +86-10-68918979; Tel: +86-10-68918979; E-mail: dinglibing13@sina.com; hanshengli@bit.edu.cn; luckynanbin@gmail.com; zhangkun19910912@163.com; yuanhong@bit.edu.cn; wuqin\_bit@126.com; zhaoyun@bit.edu.cn; jiaoqz@bit.edu.cn; shidaxin@bit.edu.cn

<sup>b</sup> School of Chemical Engineering and Materials Science, Beijing Institute of Technology, Zhuhai, 519085, China.

## Supplementary data

### 1. <sup>1</sup>H NMR spectrum of the BPIL

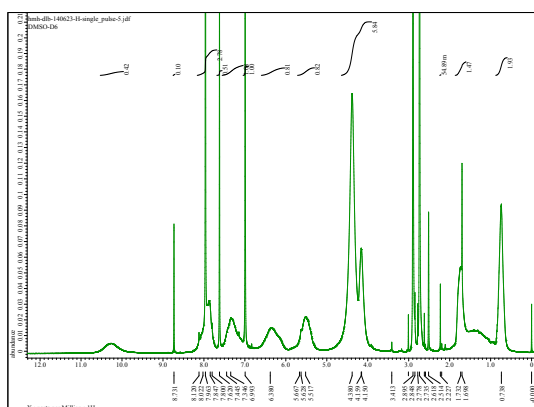

Fig. 1 <sup>1</sup>H NMR spectrum of the BPIL

<sup>1</sup>H NMR spectral data of 1-[(4-ethenylphenyl) methyl]-3-propylimidazolium imidazolid (BPIL) was showed in Fig. 1. However, there are many pimpled peaks in the NMR spectrum because BPIL is a polymer with a high degree of polymerization. Some other peaks are founded for no further purification of BPIL. Therefore, the electron spray ionization mass spectrometry under the negative mode was provided for further structural determination.

### 2. The mass spectrum of BPIL under the negative ion mode

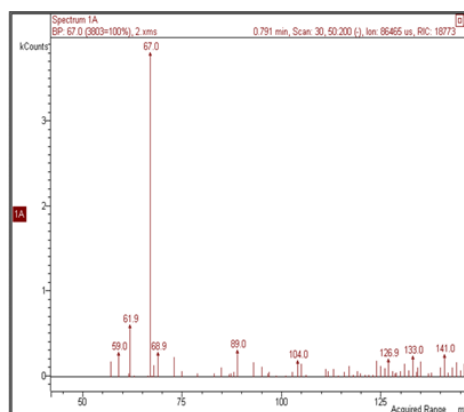

Fig. 2 The mass spectrum of BPIL under the negative ion mode
